# Supplementary material for: Changes in work and life patterns associated with depressive symptoms during the COVID-19 pandemic: an observational study of health app (CALO mama) users
Source: HighWire-hosted journal article supplement (doi:10.1136/oemed-2020-106945), 2021-02-22
Supplement: oemed-2020-106945supp001_data_supplement.pdf [file oemed-2020-106945supp001_data_supplement.pdf]

**Supplementary File**  
**Changes in work and life patterns associated with depressive symptoms during the COVID-19 pandemic: An observational study of health app (*CALO mama*) users**

**eTable 1. Comparison between analytical and excluded sample, 2020, Japan**

| Variables                                | Analytical sample (n = 2,846) |      |      |      | Excluded sample (n = 2,554) |      |      |      | P-value† |
|------------------------------------------|-------------------------------|------|------|------|-----------------------------|------|------|------|----------|
|                                          | n                             | %    | Mean | SD   | n                           | %    | Mean | SD   |          |
| Female                                   | 1,696                         | 59.6 |      |      | 1,864                       | 73.0 |      |      | <0.001   |
| Age                                      |                               |      | 46.0 | 11.9 |                             |      | 42.0 | 13.5 | <0.001   |
| Full-time worker                         |                               |      |      |      |                             |      |      |      |          |
| Pre-declaration period                   | 2,519                         | 88.5 |      |      | 2,232                       | 87.4 |      |      | 0.21     |
| Declaration period                       | 2,165                         | 76.1 |      |      | 1,744                       | 68.3 |      |      | <0.001   |
| Lifestyle changes                        |                               |      |      |      |                             |      |      |      |          |
| Suspension of work or loss of employment | 281                           | 9.9  |      |      | 339                         | 13.3 |      |      | <0.001   |
| Increased working hours                  | 243                           | 8.5  |      |      | 182                         | 7.1  |      |      | 0.06     |
| Shift to working from home               | 769                           | 27.0 |      |      | 651                         | 25.5 |      |      | 0.20     |
| Increased time on childcare              | 277                           | 9.7  |      |      | 306                         | 12.0 |      |      | 0.01     |
| Depressive symptoms                      | 1,140                         | 40.1 |      |      | 1,058                       | 41.4 |      |      | 0.32     |

† P-values of t-test and chi-square test for differences between analytical and excluded sample.

Abbreviations: SD, standard deviation.

**eTable 2. Comparison between analytical sample and national surveys, 2020, Japan**

| Variables                                 | Analytical sample (n = 2,846) |      |       |       | National survey |      |       |       |
|-------------------------------------------|-------------------------------|------|-------|-------|-----------------|------|-------|-------|
|                                           | n                             | %    | Mean  | SD    | n               | %    | Mean  | SD    |
| Women†                                    | 1,696                         | 59.6 |       |       | 2,914           | 44.0 |       |       |
| Age†                                      |                               |      |       |       |                 |      |       |       |
| <20                                       | 56                            | 2.0  |       |       | 104             | 1.6  |       |       |
| 20-29                                     | 254                           | 8.9  |       |       | 962             | 14.5 |       |       |
| 30-39                                     | 518                           | 18.2 |       |       | 1,250           | 18.9 |       |       |
| 40-49                                     | 777                           | 27.3 |       |       | 1,616           | 24.4 |       |       |
| 50-59                                     | 902                           | 31.7 |       |       | 1,306           | 19.7 |       |       |
| ≥60                                       | 339                           | 11.9 |       |       | 1,383           | 20.9 |       |       |
| Full-time work†                           |                               |      |       |       |                 |      |       |       |
| Men                                       | 1,112                         | 96.7 |       |       | 3,075           | 82.9 |       |       |
| Women                                     | 1,407                         | 83.0 |       |       | 1,747           | 59.9 |       |       |
| Average steps‡                            |                               |      |       |       |                 |      |       |       |
| Men                                       | 1,076                         |      | 8,171 | 4,526 | 1,546           |      | 7,644 | 4,627 |
| Women                                     | 1,617                         |      | 6,142 | 3,550 | 1,736           |      | 6,705 | 3,514 |
| Suspension of work or loss of employment* |                               |      |       |       |                 |      |       |       |
| Men                                       | 43                            | 3.7  |       |       | 181             | 4.9  |       |       |
| Women                                     | 238                           | 14.0 |       |       | 250             | 8.4  |       |       |

† The analytical sample was compared with the number of employed persons (10,000 persons) from the Employment Status Survey, 2017 (the Statistics Bureau, Ministry of Internal Affairs and Communications). The national total number of employed persons was 66,213,000 persons. The number of full-time workers for the analytical sample was in the pre-declaration period.

‡ The average steps in the pre-declaration period for our analytical sample was compared with data of 20-64 year old persons from the National Health and Nutrition Survey, 2018 (Ministry of Health, Labour and Welfare). To compare with the national survey, we limited the analytical sample to 20-64 year old participants and included their data from holidays.

\* The number of those who experienced suspension of work or loss of employment in the national survey was from the Labour Force Survey (the Statistics Bureau, Ministry of Internal Affairs and Communications). The number was calculated by subtracting the number of those who were absent from work or unemployed in February from the number in April, 2020 (10,000 persons). The denominator of the percentage was the total number of employed persons in February, 2020 (66,910,000 persons).

Abbreviations: SD, standard deviation.
